# Supplementary material
Source: ML conference proceedings conference paper supplement (https://openreview.net/forum?id=RADrFxYqIH)
Supplement: supplementary_material [file attachment]

## 524 6 Appendix

### 525 6.1 Hosting and maintenance plan

526 This dataset will be hosted on MIT servers in perpetuity at <https://objectnet.dev/flash/> with  
527 a backup on dropbox. Our dataset collection toolbox is hosted publicly on github at  
528 <https://github.com/dmayo/MVT-difficulty>. A datacard for this dataset will be available at  
529 <https://objectnet.dev/flash/datacard>.

### 530 6.2 Object classes

531 Test subjects were presented with images from 50 possible object classes and asked to select which  
532 object they saw. The 50 classes were hand-picked to minimize similarity between classes that could  
533 be confusing for experiment subjects. The object classes were:  
534 Band-Aid, T-shirt, backpack, banana, cleaver, clothes iron, coffee mug, computer mouse, digital  
535 watch, doormat, dumbbell, envelope, hair dryer, hammer, lampshade, lemon, lipstick, match, mobile  
536 phone, necklace, padlock, paintbrush, paper towel, park bench, pill bottle, pillow, plastic bag, plunger,  
537 power drill, printer, racket, ruler, safety pin, salt shaker, sandal, screw, shovel, space heater, spatula,  
538 speaker, strainer, sunglasses, teddy bear, television, umbrella, vase, wallet, waste container, water  
539 bottle, whistle

### 540 6.3 Image Selection

541 After choosing object classes, we selected images for the experiment. We used all 50 images  
542 belonging to a class in the ImageNet Validation set with no additional selection step. For ObjectNet,  
543 we collected bounding box data for the images, and then randomly selected 50 images per class such  
544 that when cropped to the bounding box, the object in the image was centered and clear.

### 545 6.4 Image cropping procedure

- 546 1. We draw a bounding box around the object (we use existing bounding boxes for the ImageNet  
547 validation set and collect our own bounding boxes for ObjectNet from MTurk).
- 548 2. We initialize the cropping box to be the bounding box.
- 549 3. If the cropping box does not form a square, we extend the shorter side of the rectangular  
550 cropping box to form a square. If the image is not large enough to extend the shorter side of  
551 the cropping box, we pad it with black pixels to form a square.
- 552 4. We crop using the cropping box for the image. The cropped image will be a square.
- 553 5. We resize the cropped image to be 224x224 pixels.

### 554 6.5 Mask generation

555 The masks were generated following the procedure used by [41]. Specifically, a Fourier transform  
556 was applied to each image to obtain the magnitude and phase components. Then, a random array  
557 with elements sampled uniformly from [0, 1] was added to the image phase component after which  
558 the magnitude and phase components were recombined via an inverse Fourier transform to produce  
559 the mask. Each image was paired with its particular phase-scrambled mask in the experiments.

### 560 6.6 Experiment Procedure and Payment

561 Participants both in the lab and on Mechanical Turk were presented with a document informing  
562 them of the purpose, privacy, and risks associated with the experiment and soliciting their consent to  
563 participate (see fig. 10). Participants were then instructed as to how to carry out the experiment and  
564 were shown an example video as well as the list of image classes for their review before beginning.  
565 They were informed that they would not need to memorize the classes as the classes would be shown

Table 1: Dataset statistics

|                                  |         |
|----------------------------------|---------|
| number of responses              | 200,382 |
| number of images                 | 4,771   |
| number of presentation durations | 6       |
| number of response per image     | 42      |
| number of objectnet images       | 2415    |
| number of imagenet images        | 2356    |
| number of participants           | 2647    |

to them after each video. Participants were also encouraged to take breaks should they feel fatigued or otherwise uncomfortable. Example instructions are shown in fig. 11

After giving consent and reading the experiment overview, participants then completed two calibration steps for to estimate the size of their monitor and their distance from the screen for us to then size the videos appropriately to 8 degrees of visual angle. First, the participants are shown an image of a credit card and are asked to use a card of their own to adjust a slider to change the size of the card on the screen to the size of their card. Since credit cards are the same size around the world, this allows us to measure the pixel-to-inches ratio of the participant’s monitor. Next, the participant completes a blind-spot test [37] that allows us to estimate the distance they are sitting from their screen. Together, these two measurements are sufficient to compute the desired video eccentricity. See fig. 12 for images of the calibration steps.

The estimated hourly wage for participants on Mechanical Turk and in the lab was \$10/hr and \$20/hr respectively with approximately \$15,000 spent in total on participant compensation.

## 6.7 In-Lab Experiment Results

To corroborate our Amazon Mechanical Turk results, we selected 200 images shown to Turk workers to conduct the same experiment in a controlled laboratory setting. 12 individuals came to participate in the experiment in which they viewed and responded to all 200 images on our 144Hz refresh rate monitor with 1ms gray-to-gray time. After conducting the experiment, 3 individuals had seen each image at each of the 4 presentation times. When compared to the MTurk results for those same 200 images, the comparison is much as we would expect. The In-Lab accuracy with shortest image duration (17ms) is less than on MTurk which can likely be contributed to the use of our new, high refresh-rate monitor in the controlled environment. It is likely that MTurk workers’ personal computers differ in their graphics presentation abilities which may result in the image being visible for slightly greater than 17ms on some monitors. On the other end, the in-lab experiments reported higher accuracy at the longest image duration (10s) which is also unsurprising as the in-lab participants completed the task in a controlled environment with no distractions and are likely more inclined to take the task seriously and stay focused. The results show no significant differences in accuracy at the intermediate image durations. See fig. 4 for a side-by-side comparison between MTurk and In-Lab results.

## 6.8 Dataset statistics

We collected 42 human responses for each of 5,000 images (2,500 from ImageNet and 2,500 from ObjectNet). After reviewing response, 229 images were removed due to either being unrecognizable, mislabeled, or having been seen by the same worker twice despite safeguards in place to disallow it. Additional dataset statistics are listed in table 1.

## 6.9 Preliminary COCO MVT Results

To bolster our claims about the difficulty of current datasets, we conducted the MTurk MVT experiment on a small subset of the COCO dataset. As COCO is a more visually complex dataset than

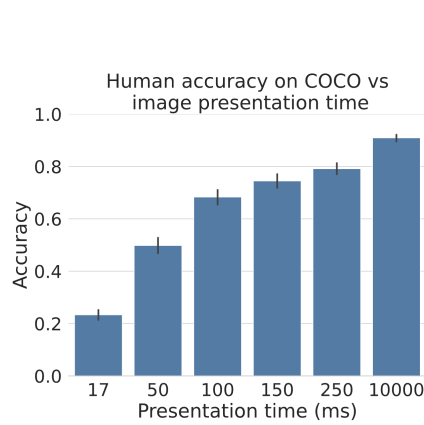

(a) Human accuracy per timing on COCO.

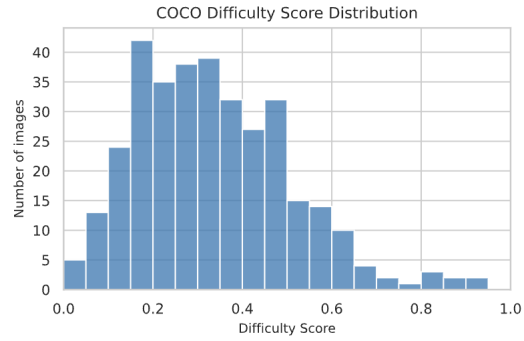

(b) Difficulty score for COCO images normalized by number of collected responses per image. A difficulty score of 1.0 here corresponds to 42 in figure 1

many single object classification datasets, it provides a good litmus test for how our conclusions generalize to other kinds of datasets.

### 6.9.1 Image selection

To maximize the utility of our results for both computer science and neuroscience research we selected 732 images from the Natural Scenes Dataset [42], a subset of COCO for which fMRI data was collected from human participants. We used the image crops used in the NSD experiments. These crops ensure that the image is square.

### 6.9.2 Image classes

We selected a set of 41 classes such that no image contained more than one of the classes.

### 6.9.3 Experimental procedure

We conducted the MVT experiment as described in the text, asking participants to perform a 1-of-41 forced-choice single-object recognition task.

Below, we present preliminary results computed on 340 of the images. The final manuscript will include all 732 images. The results in section 6.9.3 are striking in their similarity to those presented for ImageNet and ObjectNet in the main text. The accuracy of human workers at each of the presentation times while performing the COCO classification task is almost the same as that of the ImageNet experiments. Given that both ImageNet and COCO originate from the same online pool of images, this is to be expected.

Similarly, the difficulty scores of COCO images (the counterpart of fig. 1) is skewed toward easy images, perhaps more so than either ImageNet or ObjectNet. These results indicate that our conclusions about the difficulty distributions of individual object recognition tasks in vision datasets generalizes. Of course, COCO has images where multiple object classes are present, which involves visual search in addition to recognizing individual image instances, but, for the quantity that we measure here, how hard are objects themselves to recognize, it COCO and ImageNet are essentially the same.

## 6.10 Finetuned Models

Here we list details regarding training/finetuning procedures for the model results reported in the paper.

### Informed consent to participate in this study

This HIT is part of a MIT scientific research project. Your decision to complete this HIT is voluntary. There is no way for us to identify you.

The only information we will have, in addition to your responses, is the time at which you completed the survey and generic non-identifiable about your computer such as its resolution and browser version number.

The results of the research may be presented at scientific meetings or published in scientific journals.

The responses collected in this experiment will be released to the scientific community and the public.

Clicking on the 'SUBMIT' button on the bottom of this page indicates that you are at least 18 years of age and agree to complete this HIT voluntarily.

**\*\* This experiment contains flashing videos. If you have photosensitive epilepsy or any sensitivity to flashing lights you are not eligible and cannot participate in this study.**

☐ I do not have photosensitive epilepsy or any sensitivity to flashing lights

Submit

Figure 10: Informed consent page shown to participants before beginning the experiment.

### Task Overview

Please read the following:

You are participating in an experiment in which we are studying people's ability to recognize what object is in an image given varying amounts of image viewing time.

Included below is an example of what we will ask you to view. Look at the center of the cross. When the video plays, the cross will briefly change to an image of an object and then it will change to an image of a random pattern. After you see the image we will ask you what object you saw in the image. You will only be able to play the video once, so be ready and focused before pressing play. The image may disappear too quickly for you to immediately be able to name the object that you saw, that's okay. Look at the multiple choice list of possible objects, think about what you saw, and take your best guess. There is no time limit for your response, but you have to respond before you can move on to the next image.

Play example video

The multiple choice list of objects will be the same for all the images. Take a minute to read all these object names. If you are unfamiliar with a category or find it confusing, do a quick search on the web to see some example images. **YOU DO NOT NEED TO MEMORIZE THESE CATEGORIES**, they will be shown to you again after you watch each video.

|                 |                              |                                  |
|-----------------|------------------------------|----------------------------------|
| backpack        | banana                       | band-aid                         |
| bench           | butcher's knife / cleaver    | cell phone                       |
| computer mouse  | doormat                      | power drill                      |
| envelope        | hair dryer                   | hammer                           |
| clothes iron    | lampshade                    | lemon                            |
| lipstick        | match (i.e. matchstick)      | mug                              |
| necklace        | padlock                      | paintbrush                       |
| paper towel     | pill bottle                  | pillow                           |
| plastic bag     | plunger                      | portable heater                  |
| printer         | ruler (i.e. measuring stick) | safety pin                       |
| salt shaker     | sandal                       | screw                            |
| shovel          | spatula                      | speaker                          |
| strainer        | stuffed animal               | sunglasses                       |
| t-shirt         | racket (i.e. tennis racket)  | waste container (i.e. trash bin) |
| television (TV) | umbrella                     | vase                             |
| wallet          | watch                        | water bottle                     |
| dumbbell        | whistle                      |                                  |

On the response page, you will see a table with these 50 options displayed. The order of the options in the table will be randomized but all 50 options will always be visible. Please take the time to find the correct answer if you know what it is. If you do not know what you saw, take your best guess. **We will know if you are not trying to answer correctly and your submission will be rejected. Please take this task seriously.**

In this experiment you will look at some images and tell us what objects you saw. We expect this to take about 60 minutes. You can take breaks at any time. If you feel like you are tired or having trouble focusing please take a break and resume the experiment later. Please try to take your breaks after submitting a response for an image and before clicking play on the next image. Responses are saved as you submit them so as long as you return to the same link, you will be able to pick up where you left off.

We would also like you to view our experiment in a quiet and well-lit room if possible.

Thank you for participating

Figure 11: Instructions given to participants before beginning the experiment.

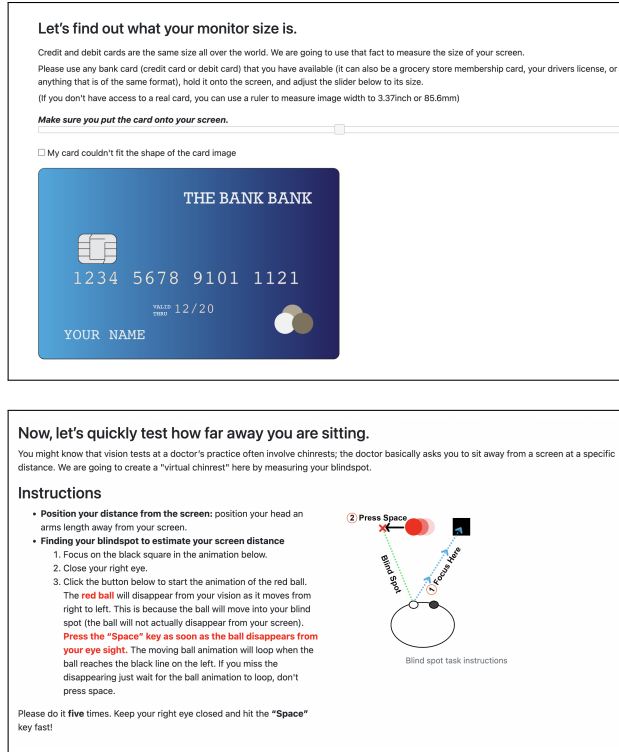

Figure 12: Images of the experiment calibration steps. The credit card task was used to measure the pixel-to-inches ratio of the subject's screen. The blind spot task provided an estimate of the subjects distance from their screen.

## 6.10.1 Model training procedure

Pretrained models weights were instantiated using publicly available model checkpoints, either using torchvision or found on the model's source repository. The models—with the exception of CLIP—were then finetuned using subsets of the ImageNet training and validation sets containing only the 50 classes we chose to use in the psychophysics experiments. The models were finetuned for 90 epochs with an SGD optimizer and initial learning rate of 0.1 with momentum value of 0.9 and weight decay coefficient of 0.0001. The learning rate decayed by a factor of 2 every 9 epochs. Training, finetuning, and inference were performed on a cluster of 8 Nvidia TITAN RTX graphics cards.

## 6.10.2 Model Performance

We evaluate our finetuned models on the same cropped images used in our psychophysics experiments. See table 4 for model accuracy reports on the image difficulty reported in the paper and table 2 and table 3 for model performance on the full ImageNet and ObjectNet subsets of the experiment images.

## 6.11 Metric calculation procedure

In this section, we go through the details in computing c-score, prediction depth, and adversarial robustness for our experiment images.

### 6.11.1 C-score

C-score [7] identifies individual image difficulty by characterizing the expected accuracy or a held-out image given training sets of varying size sampled from the data distribution. In particular, c-score is the frequency of classifying an example correctly when it is omitted from the training set. However,

Table 2: Model accuracy on ImageNet per MVT subset. Models are named to include architecture, training objective, and training dataset where appropriate. ResNet-X-Y% indicates a ResNet with depth X and trained on a random Y% subset of the ImageNet-1k dataset. Model names ending in 21k were pretrained on ImageNet-21k. All other models with the exception of SWSL and CLIP models were pre-trained on the full ImageNet-1k dataset.

| Subset                          | <= 17 | <= 50 | <= 100 | <= 150 | <= 250 | <= 10000 |
|---------------------------------|-------|-------|--------|--------|--------|----------|
| ResNet-18                       | 94.4  | 91.8  | 81.1   | 77.2   | 61.3   | 49.0     |
| ResNet-18-20%                   | 81.9  | 77.2  | 63.7   | 58.2   | 39.8   | 34.9     |
| ResNet-18-40%                   | 84.4  | 85.0  | 67.8   | 63.5   | 50.5   | 46.2     |
| ResNet-18-60%                   | 87.5  | 88.3  | 72.6   | 70.4   | 53.8   | 46.2     |
| ResNet-18-80%                   | 88.1  | 86.5  | 76.7   | 68.8   | 54.8   | 48.6     |
| ResNet-50                       | 94.4  | 95.5  | 85.2   | 84.7   | 79.6   | 64.7     |
| ResNet-50-20%                   | 86.9  | 82.9  | 72.2   | 65.1   | 48.4   | 41.0     |
| ResNet-50-40%                   | 93.8  | 89.1  | 74.1   | 74.1   | 60.2   | 48.2     |
| ResNet-50-60%                   | 91.2  | 90.2  | 78.5   | 79.4   | 60.2   | 59.4     |
| ResNet-50-80%                   | 90.6  | 91.5  | 83.0   | 80.4   | 68.8   | 59.0     |
| ResNet-101                      | 95.0  | 95.2  | 90.0   | 87.8   | 79.6   | 71.5     |
| ResNet-101-20%                  | 86.2  | 85.4  | 70.0   | 66.1   | 50.5   | 48.2     |
| ResNet-101-40%                  | 90.6  | 90.0  | 78.1   | 77.8   | 63.4   | 50.6     |
| ResNet-101-60%                  | 93.1  | 89.9  | 84.4   | 77.2   | 62.4   | 59.0     |
| ResNet-101-80%                  | 92.5  | 94.1  | 83.0   | 82.5   | 64.5   | 61.8     |
| ResNet-152                      | 93.8  | 96.4  | 93.7   | 86.8   | 78.5   | 72.7     |
| ResNet-152-20%                  | 86.9  | 84.4  | 73.0   | 71.4   | 52.7   | 44.2     |
| ResNet-152-40%                  | 93.1  | 88.4  | 76.3   | 76.7   | 62.4   | 52.6     |
| ResNet-152-60%                  | 93.1  | 90.4  | 82.2   | 78.8   | 66.7   | 59.4     |
| ResNet-152-80%                  | 90.6  | 91.9  | 86.3   | 85.7   | 76.3   | 60.6     |
| CORNet-S                        | 93.8  | 92.6  | 81.9   | 78.8   | 58.1   | 52.2     |
| VOneNet-Resnet50                | 93.8  | 94.4  | 84.4   | 82.5   | 67.7   | 56.6     |
| VOneNet-CORNet-S                | 91.9  | 92.3  | 82.2   | 77.2   | 63.4   | 53.4     |
| VGG-19                          | 91.9  | 90.2  | 80.7   | 79.4   | 62.4   | 55.4     |
| Noisy Student (EfficientNet-L2) | 95.0  | 93.3  | 87.8   | 86.8   | 68.8   | 65.5     |
| DenseNet-121                    | 94.4  | 93.3  | 83.3   | 80.4   | 72.0   | 58.6     |
| MSDNet Classifier 0             | 78.8  | 76.0  | 60.0   | 54.0   | 40.9   | 33.7     |
| MSDNet Classifier 1             | 89.4  | 86.2  | 73.7   | 67.7   | 53.8   | 45.8     |
| MSDNet Classifier 2             | 91.9  | 89.9  | 77.8   | 72.5   | 62.4   | 51.4     |
| MSDNet Classifier 3             | 91.9  | 90.4  | 79.3   | 69.8   | 63.4   | 51.4     |
| MSDNet Classifier 4             | 94.4  | 91.3  | 79.3   | 78.8   | 62.4   | 52.2     |
| SimCLR ResNet50                 | 88.1  | 86.3  | 73.7   | 69.8   | 60.2   | 54.6     |
| SimCLR ResNet101                | 93.1  | 89.6  | 79.3   | 83.6   | 72.0   | 57.8     |
| SimCLR ResNet152                | 93.8  | 92.1  | 83.7   | 81.0   | 72.0   | 63.9     |
| CLIP-ViT-B/32                   | 95.6  | 90.8  | 79.3   | 74.6   | 67.7   | 48.6     |
| CLIP-ViT-B/16                   | 97.5  | 94.7  | 83.3   | 81.0   | 80.6   | 52.2     |
| CLIP-ViT-L/14                   | 98.1  | 97.1  | 92.6   | 91.0   | 86.0   | 72.3     |
| CLIP-ViT-L/14@336px             | 98.1  | 96.9  | 91.5   | 92.6   | 89.2   | 73.9     |
| CLIP-ResNet-50                  | 92.5  | 84.4  | 69.6   | 67.7   | 55.9   | 34.5     |
| CLIP-ResNet-101                 | 94.4  | 88.1  | 71.9   | 68.8   | 67.7   | 41.0     |
| CLIP-ResNet-50x4                | 93.8  | 88.8  | 75.6   | 72.5   | 71.0   | 41.8     |
| CLIP-ResNet-50x16               | 94.4  | 91.5  | 81.1   | 77.2   | 68.8   | 43.8     |
| CLIP-ResNet-50x64               | 98.8  | 95.9  | 87.0   | 85.2   | 77.4   | 59.0     |
| EfficientNet-S                  | 91.2  | 92.5  | 84.1   | 78.3   | 64.5   | 62.2     |
| EfficientNet-M                  | 90.6  | 91.5  | 80.7   | 73.5   | 69.9   | 61.4     |
| EfficientNet-L                  | 95.0  | 93.0  | 87.4   | 83.6   | 75.3   | 64.3     |
| EfficientNet-S-21               | 96.9  | 95.6  | 92.6   | 87.8   | 81.7   | 71.5     |
| EfficientNet-M-21               | 97.5  | 97.0  | 93.7   | 88.9   | 84.9   | 72.3     |
| EfficientNet-L-21               | 98.1  | 96.7  | 93.0   | 90.5   | 86.0   | 73.5     |
| ViT-T/16                        | 67.5  | 72.3  | 57.8   | 54.5   | 38.7   | 34.5     |
| ViT-S/16                        | 95.0  | 94.5  | 82.6   | 85.2   | 68.8   | 58.6     |
| ViT-B/16                        | 96.2  | 95.6  | 85.2   | 87.3   | 67.7   | 63.5     |
| ViT-L/16                        | 98.8  | 97.5  | 97.4   | 96.8   | 84.9   | 80.7     |
| MoCo-V3                         | 92.5  | 92.6  | 85.6   | 84.7   | 75.3   | 64.7     |
| SWSL-ResNext101-32x16d          | 96.9  | 98.1  | 97.4   | 95.8   | 87.1   | 85.5     |
| SWSL-ResNet50                   | 96.2  | 97.7  | 96.7   | 95.2   | 84.9   | 77.9     |
| MAE-ViT-B/16                    | 94.4  | 95.6  | 88.9   | 89.9   | 77.4   | 75.1     |

650 computing c-score for each image by brute force is computationally infeasible since we must train  
651 a separate model for each image. Instead, we computed the learning speed proxy as recommended  
652 by the authors. Learning speed measures the epoch at which an image is correctly classified by a  
653 model. Intuitively, a training example that is consistent with the training set should be learned quickly  
654 because the gradient step for all consistent examples should be similar. The authors found high  
655 Spearman rank correlation between c-score and cumulative learning speed based proxies.

656 We trained a ResNet-50 [43] from scratch on ImageNet1k [16] for 90 epochs with an SGD optimizer  
657 and initial learning rate of 0.1 with momentum value of 0.9 and weight decay coefficient of 0.0001.  
658 The learning rate decayed by a factor of 2 every 9 epochs and the batch size was 256. The standard  
659 ImageNet transforms were applied to all images, and the network was initialized randomly. We then  
660 evaluated our experiment images at each epoch and used the average of correct predictions as an  
661 estimated c-score for each image. fig. I3 shows the average c-scores for ImageNet and ObjectNet

Table 3: Model accuracy on ObjectNet per recognition time subset.

| Subset                          | <= 17 | <= 50 | <= 100 | <= 150 | <= 250 | <= 10000 |
|---------------------------------|-------|-------|--------|--------|--------|----------|
| ResNet-18                       | 76.1  | 65.1  | 49.1   | 41.2   | 25.3   | 20.6     |
| ResNet-18-20%                   | 46.2  | 44.8  | 29.6   | 27.5   | 11.5   | 12.5     |
| ResNet-18-40%                   | 58.1  | 53.8  | 43.0   | 35.2   | 20.7   | 16.2     |
| ResNet-18-60%                   | 67.5  | 60.0  | 43.3   | 37.9   | 19.5   | 17.4     |
| ResNet-18-80%                   | 66.7  | 63.4  | 45.7   | 37.4   | 26.4   | 17.1     |
| ResNet-50                       | 80.3  | 79.7  | 62.9   | 53.3   | 44.8   | 27.0     |
| ResNet-50-20%                   | 58.1  | 51.1  | 36.4   | 35.2   | 24.1   | 15.7     |
| ResNet-50-40%                   | 70.1  | 61.7  | 45.4   | 42.9   | 29.9   | 20.3     |
| ResNet-50-60%                   | 70.9  | 70.1  | 54.0   | 45.1   | 33.3   | 19.7     |
| ResNet-50-80%                   | 76.9  | 70.4  | 53.3   | 49.5   | 31.0   | 22.0     |
| ResNet-101                      | 86.3  | 81.0  | 68.7   | 54.9   | 47.1   | 29.6     |
| ResNet-101-20%                  | 50.4  | 53.3  | 41.2   | 33.0   | 21.8   | 13.6     |
| ResNet-101-40%                  | 66.7  | 61.5  | 47.4   | 35.7   | 27.6   | 18.3     |
| ResNet-101-60%                  | 76.9  | 70.3  | 52.9   | 46.7   | 36.8   | 22.6     |
| ResNet-101-80%                  | 75.2  | 75.2  | 62.9   | 46.2   | 34.5   | 25.2     |
| ResNet-152                      | 85.5  | 83.8  | 68.7   | 60.4   | 46.0   | 30.7     |
| ResNet-152-20%                  | 58.1  | 53.7  | 39.2   | 34.6   | 19.5   | 13.6     |
| ResNet-152-40%                  | 66.7  | 65.1  | 49.5   | 42.9   | 25.3   | 19.1     |
| ResNet-152-60%                  | 72.6  | 68.4  | 57.0   | 41.8   | 35.6   | 22.6     |
| ResNet-152-80%                  | 74.4  | 73.5  | 55.7   | 50.0   | 35.6   | 24.6     |
| CORNet-S                        | 75.2  | 71.5  | 53.6   | 45.1   | 36.8   | 20.3     |
| VOneNet-Resnet50                | 77.8  | 75.7  | 59.1   | 45.6   | 35.6   | 20.9     |
| VOneNet-CORNet-S                | 72.6  | 67.0  | 51.9   | 42.9   | 31.0   | 16.5     |
| VGG-19                          | 76.1  | 66.3  | 50.9   | 46.7   | 34.5   | 18.3     |
| Noisy Student (EfficientNet-L2) | 76.9  | 68.7  | 54.3   | 45.1   | 26.4   | 20.9     |
| DenseNet-121                    | 77.8  | 74.9  | 57.0   | 49.5   | 33.3   | 22.3     |
| MSDNet Classifier 0             | 45.3  | 39.0  | 31.3   | 28.0   | 17.2   | 10.7     |
| MSDNet Classifier 1             | 62.4  | 56.4  | 41.9   | 36.3   | 23.0   | 15.9     |
| MSDNet Classifier 2             | 70.9  | 64.3  | 52.9   | 44.0   | 28.7   | 22.3     |
| MSDNet Classifier 3             | 76.9  | 68.7  | 51.5   | 46.7   | 29.9   | 21.7     |
| MSDNet Classifier 4             | 73.5  | 70.9  | 51.5   | 47.3   | 37.9   | 22.3     |
| SimCLR ResNet50                 | 60.7  | 61.0  | 49.8   | 45.6   | 27.6   | 17.4     |
| SimCLR ResNet101                | 75.2  | 70.3  | 59.5   | 55.5   | 32.2   | 25.8     |
| SimCLR ResNet152                | 78.6  | 70.3  | 57.0   | 55.5   | 35.6   | 28.7     |
| CLIP-ViT-B/32                   | 88.9  | 80.5  | 61.2   | 61.0   | 43.7   | 33.6     |
| CLIP-ViT-B/16                   | 92.3  | 88.2  | 78.0   | 69.8   | 50.6   | 48.4     |
| CLIP-ViT-L/14                   | 97.4  | 93.8  | 88.7   | 81.3   | 78.2   | 70.1     |
| CLIP-ViT-L/14@336px             | 96.6  | 94.2  | 91.1   | 85.2   | 80.5   | 70.1     |
| CLIP-ResNet-50                  | 78.6  | 73.5  | 58.1   | 54.9   | 34.5   | 27.5     |
| CLIP-ResNet-101                 | 86.3  | 76.9  | 63.6   | 58.2   | 41.4   | 32.5     |
| CLIP-ResNet-50x4                | 83.8  | 79.3  | 67.4   | 64.8   | 43.7   | 36.8     |
| CLIP-ResNet-50x16               | 92.3  | 85.0  | 74.2   | 69.2   | 52.9   | 48.7     |
| CLIP-ResNet-50x64               | 89.7  | 90.3  | 84.2   | 81.9   | 69.0   | 55.9     |
| EfficientNet-S                  | 68.4  | 66.2  | 52.9   | 40.1   | 23.0   | 20.6     |
| EfficientNet-M                  | 71.8  | 66.3  | 47.8   | 39.0   | 20.7   | 18.8     |
| EfficientNet-L                  | 75.2  | 71.5  | 54.0   | 45.1   | 31.0   | 23.2     |
| EfficientNet-S-21               | 94.0  | 83.9  | 72.9   | 64.8   | 41.4   | 30.4     |
| EfficientNet-M-21               | 88.9  | 87.5  | 71.1   | 67.0   | 46.0   | 34.2     |
| EfficientNet-L-21               | 89.7  | 86.2  | 70.1   | 68.7   | 50.6   | 36.5     |
| ViT-T/16                        | 43.6  | 43.4  | 29.6   | 25.3   | 10.3   | 10.7     |
| ViT-S/16                        | 83.8  | 76.8  | 57.7   | 52.2   | 31.0   | 23.5     |
| ViT-B/16                        | 86.3  | 80.2  | 65.6   | 58.2   | 37.9   | 26.4     |
| ViT-L/16                        | 96.6  | 92.5  | 84.9   | 81.3   | 58.6   | 44.9     |
| MoCo-V3                         | 82.9  | 73.3  | 59.1   | 54.9   | 34.5   | 24.6     |
| SWSL-ResNext101-32x16d          | 94.0  | 94.5  | 89.3   | 85.7   | 62.1   | 57.4     |
| SWSL-ResNet50                   | 94.0  | 89.4  | 83.8   | 72.0   | 52.9   | 47.2     |
| MAE-ViT-B/16                    | 84.6  | 82.7  | 69.4   | 63.2   | 37.9   | 32.5     |

experiment images split by whether the ResNet-50 correctly predicted the image. C-score serves as an efficient predictor for human recognition difficulty only for images classified by the model in both ImageNet and ObjectNet. C-scores for images misclassified by the model do not reveal information about the human recognition difficulty and remain consistently low across all difficulty subsets.

### 6.11.2 Prediction depth

Prediction depth [8] represents the number of hidden layers after which the network’s final prediction is already determined. The authors showed that prediction depth is larger for examples that visually appear to be more difficult and is consistent between architectures and random seeds.

We trained a linear decoder at the end of each block of a ResNet-50 on the 50 experiment classes using the ImageNet training and validation set. We used the same ResNet-50 used to calculate c-scores to ensure consistency of our results. There are 16 convolutional layers in a ResNet-50; and each linear decoder follows a convolution layer and consists of a pooling layer, flatten layer, and fully-connected layer. We use the same hyperparameters as section 6.11.1 and only updated the weights of the linear decoder.



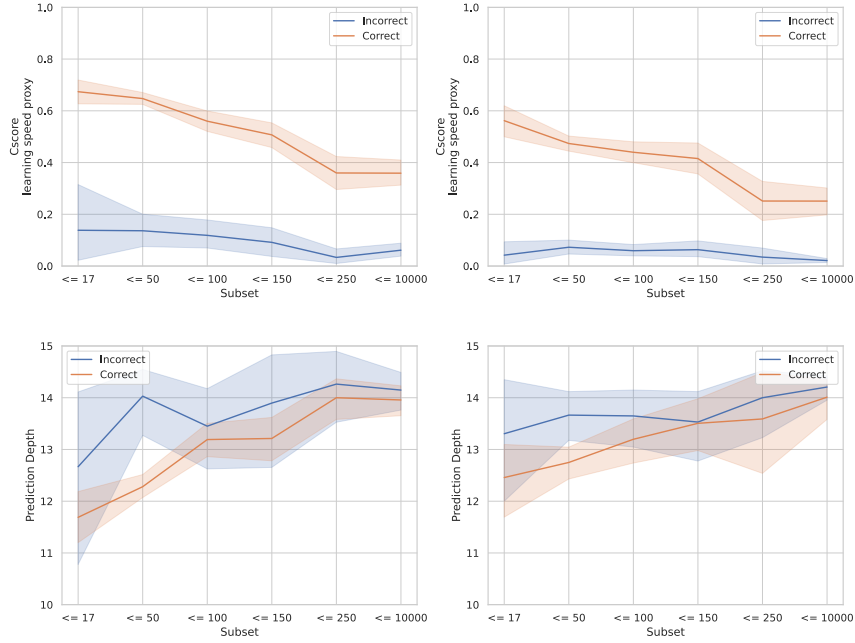

Figure 13: **Top:** left and right are average c-score over subsets for experiment ImageNet and ObjectNet images respectively. Orange shows the images that are correctly predicted by the ResNet-50 while blue shows the images that are incorrectly predicted. **Bottom:** prediction depth plots shown in the same way as top.

676 A prediction is defined to be made at depth  $L = l$  if the linear classifier after layer  $L = l - 1$  is  
677 different from the network’s final prediction, but the classification of the linear decoder after every  
678 layer  $L \geq l$  are equal to the final classification of the network. Images classified by all decoders  
679 are said to be predicted at layer 0. Note that prediction depth is independent of whether the final  
680 prediction is correct or not. It measures the layer at which an image’s prediction converges.

681 Figure 13 shows the average c-scores for ImageNet and ObjectNet experiment images split by whether  
682 the ResNet-50 correctly predicted the image. Like c-score, prediction depth serves as an efficient  
683 predictor for human recognition difficulty only for images classified by the model in both ImageNet  
684 and ObjectNet.

### 685 6.11.3 Adversarial robustness

686 We measured an image’s distance to the decision boundary of a network using fast gradient sign  
687 method (FGSM) [9]. FGSM creates an modified example that maximizes the loss using the gradients  
688 of loss with respect to the input image:

$$mod_x = x + \epsilon \cdot \text{sign}(\nabla_x J(\theta, x, y))$$

689 where  $adv_x$  is the modified image,  $x$  is the original image,  $y$  is the original input label,  $\epsilon$  is a multiplier  
690 adjusted accordingly to control the size of modification step,  $\theta$  is the model parameters, and  $J$  is the  
691 loss function. Note that gradients are taken with respect to the input image, and model parameters  
692 remain constant.

693 For an image classified by a model, we define its distance to the closest decision boundary of the  
694 model as the minimum  $\epsilon$  needed for the model to misclassify the modified image. On the other hand,  
695 for an image misclassified by a model, we define its distance to the closest decision boundary of the  
696 model as the minimum  $\epsilon$  needed for the model to classify the modified image.

697 We used the same ResNet-50 used to calculate c-scores to ensure consistency of our results. We  
698 finetuned the ResNet-50 on the 50 experiment classes using the ImageNet training and validation



set. We used the same hyperparameters as section 6.11.1 and only updated the weights of the final pooling, flatten, and fully-connected layer. We used this finetuned ResNet-50 as the backbone for adversarial perturbation and correction.

While perturbing each classified image, we searched for the smallest  $\epsilon$ , from 0 to 0.02 incrementing by  $1.25e-5$  and from 0.02 to 2.5 incrementing by 0.005, that would result in a misclassification. We only applied only one gradient step when perturbing. While correcting each misclassified image, we searched for the smallest  $\epsilon$ , from 0 to 0.001 incrementing by  $1.25e-6$  and from 0.001 to 0.05 incrementing by  $1.25e-5$ . We applied two gradient steps when correcting because correction requires finer and more steps.

Note that the search range depends on the backbone model and the dataset. One must choose them through manual trial-and-errors to yield interesting and significant results. Recall that after removing images that were incorrectly annotated, incorrectly cropped, etc section 3, we reduced to 4,771 images from the original 5,000. Of these, 3,296 and 1,475 images were classified and misclassified by the finetuned ResNet-50 respectively. We were not able to find an  $\epsilon$  for every image while perturbing and correcting in the corresponding search range. We omitted these images in our analysis. We were able to successfully perturb 2,815 out of 3,296 classified images and correct 1,114 out of 1,475 misclassified images.

We hypothesized that difficult images that are classified and misclassified would be closer and further from the decision boundary respectively. fig. 8 confirms the prior hypothesis. We could not confirm the latter hypothesis due to the smaller number of misclassified images across all subsets, as shown through the higher error bars in fig. 14

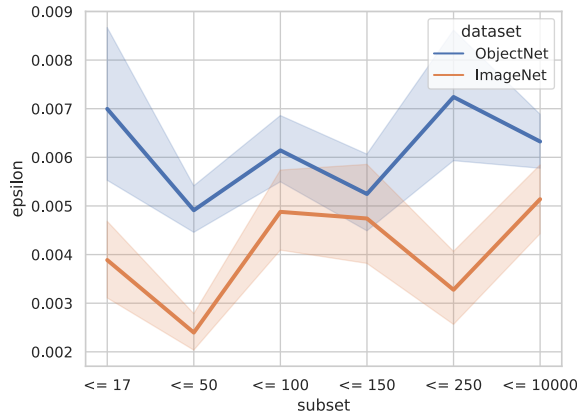

Figure 14: Average  $\epsilon$  magnitude required to correct misclassified images back to their correct class per subset

720

## 721 6.12 What factors effect MVT? Imagenet-x analysis

722 We found no clear trends across MVT subsets for the 16 dimensions labeled in the imagenet-x dataset.  
723 The results of our analysis can be found in table 5

## 724 6.13 Constructing a metric for image difficulty

725 We propose two metrics:

- 726 1. Difficulty score which provides an exact ranking from most difficult to recognize to least  
727 difficult to recognize based on each response
- 728 2. six minimum viewing time (MVT) subsets that quantify the minimum amount of time  
729 required for the majority of participants to reliably recognize an image.

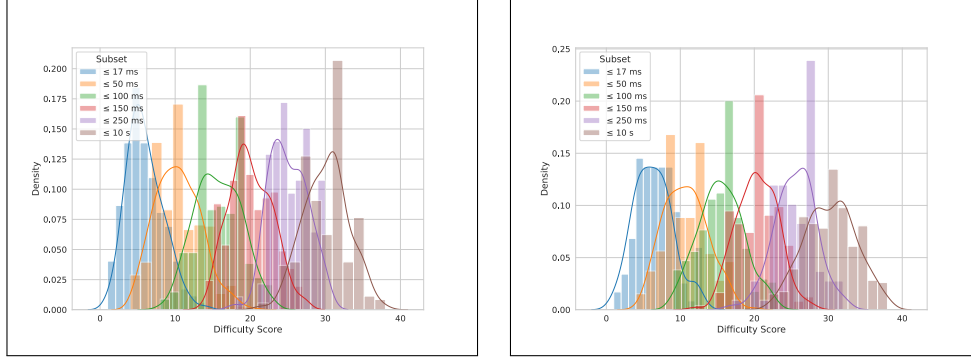

Figure 15: Distribution of difficulty score for each MVT subsets in ImageNet (left) and ObjectNet (right).

Difficulty score is a value from 0 to 42 that represents the number of incorrect predictions given by participants in our experiment across all timings for a particular image. Each image in our experiment was seen an equal number of times per timing and and only rarely were images that were recognizable at shorter timings also recognizable at longer timings. This results in a low difficulty score indicating that an image is easy to recognize and a high difficulty score indicating that an image is hard to recognize. These scores correlate well with the MVT difficulty subsets as shown in fig. 15. Difficulty score varies significantly by object class as well (see fig. 16).

#### 6.14 Difficulty score distribution by object class

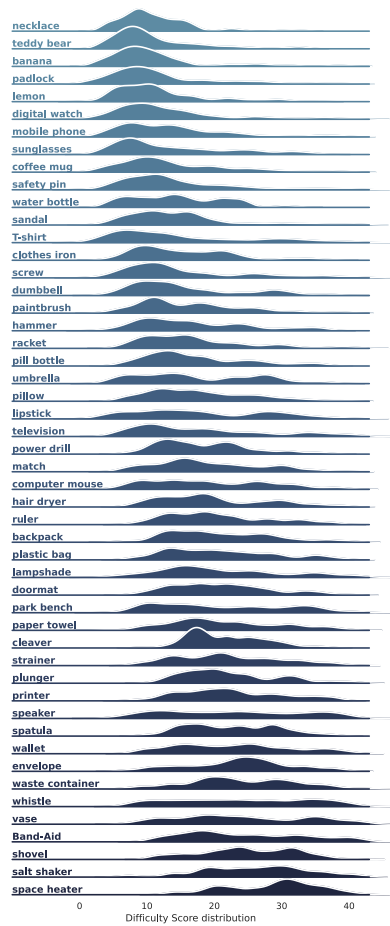

Figure 16: Difficulty distribution by object class sorted in order of increasing mean

Table 4: Model accuracy on the ImageNet and ObjectNet subsets of our 4,771 images.

|                                 |      |      |
|---------------------------------|------|------|
| ResNet-18                       | 80.4 | 48.8 |
| ResNet-18-20%                   | 65.0 | 31.1 |
| ResNet-18-40%                   | 71.5 | 39.9 |
| ResNet-18-60%                   | 75.3 | 43.6 |
| ResNet-18-80%                   | 75.6 | 45.2 |
| ResNet-50                       | 87.1 | 60.0 |
| ResNet-50-20%                   | 71.0 | 38.3 |
| ResNet-50-40%                   | 77.7 | 46.4 |
| ResNet-50-60%                   | 80.4 | 51.6 |
| ResNet-50-80%                   | 82.9 | 52.6 |
| ResNet-101                      | 89.2 | 62.7 |
| ResNet-101-20%                  | 73.2 | 37.8 |
| ResNet-101-40%                  | 79.5 | 45.0 |
| ResNet-101-60%                  | 81.9 | 52.7 |
| ResNet-101-80%                  | 84.6 | 56.7 |
| ResNet-152                      | 90.3 | 64.5 |
| ResNet-152-20%                  | 73.4 | 38.5 |
| ResNet-152-40%                  | 78.7 | 47.9 |
| ResNet-152-60%                  | 82.3 | 51.4 |
| ResNet-152-80%                  | 84.6 | 54.8 |
| CORNet-S                        | 81.6 | 52.6 |
| VOneNet-Resnet50                | 84.0 | 54.8 |
| VOneNet-CORNet-S                | 81.3 | 48.8 |
| VGG-19                          | 81.1 | 50.2 |
| Noisy Student (EfficientNet-L2) | 86.2 | 51.2 |
| DenseNet-121                    | 83.7 | 55.7 |
| MSDNet Classifier 0             | 62.8 | 29.3 |
| MSDNet Classifier 1             | 74.6 | 41.6 |
| MSDNet Classifier 2             | 78.6 | 49.6 |
| MSDNet Classifier 3             | 78.9 | 51.6 |
| MSDNet Classifier 4             | 81.0 | 52.8 |
| SimCLR ResNet50                 | 76.4 | 46.1 |
| SimCLR ResNet101                | 82.1 | 55.4 |
| SimCLR ResNet152                | 84.3 | 56.0 |
| CLIP-ViT-B/32                   | 80.0 | 63.3 |
| CLIP-ViT-B/16                   | 84.5 | 73.6 |
| CLIP-ViT-L/14                   | 92.1 | 85.8 |
| CLIP-ViT-L/14@336px             | 92.0 | 86.9 |
| CLIP-ResNet-50                  | 71.6 | 56.8 |
| CLIP-ResNet-101                 | 75.3 | 61.4 |
| CLIP-ResNet-50x4                | 77.5 | 64.6 |
| CLIP-ResNet-50x16               | 80.1 | 72.4 |
| CLIP-ResNet-50x64               | 87.1 | 79.4 |
| EfficientNet-S                  | 83.1 | 48.6 |
| EfficientNet-M                  | 81.7 | 47.2 |
| EfficientNet-L                  | 85.8 | 52.7 |
| EfficientNet-S-21               | 90.2 | 66.4 |
| EfficientNet-M-21               | 91.4 | 68.2 |
| EfficientNet-L-21               | 91.5 | 68.8 |
| ViT-T/16                        | 59.4 | 29.9 |
| ViT-S/16                        | 84.4 | 57.1 |
| ViT-B/16                        | 86.5 | 61.3 |
| ViT-L/16                        | 94.1 | 78.1 |
| MoCo-V3                         | 85.5 | 56.6 |
| SWSL-ResNext101-32x16d          | 95.1 | 82.3 |
| SWSL-ResNet50                   | 93.4 | 75.4 |
| MAE-ViT-B/16                    | 89.5 | 65.2 |

Table 5: ImageNet-x factors as a % of MVT subset. Each table entry represents the percentage of the images in MVT subset (row) that were labeled as containing a feature (column). This analysis is over the ImageNet images in our dataset.

| MVT subset | multiple objects | background | color | brighter | darker | style | larger | smaller |
|------------|------------------|------------|-------|----------|--------|-------|--------|---------|
| 17 ms      | 0.00             | 20.69      | 22.76 | 0.69     | 0.69   | 0.00  | 0.00   | 0.00    |
| 50 ms      | 0.15             | 25.23      | 20.39 | 0.00     | 0.15   | 0.15  | 0.15   | 3.32    |
| 100 ms     | 0.00             | 28.23      | 16.13 | 0.00     | 0.00   | 0.00  | 0.00   | 5.65    |
| 150 ms     | 0.00             | 25.56      | 16.67 | 0.00     | 1.11   | 0.00  | 0.56   | 4.44    |
| 250 ms     | 0.00             | 29.89      | 12.64 | 0.00     | 0.00   | 0.00  | 0.00   | 3.45    |
| 10 sec     | 0.00             | 27.27      | 16.94 | 0.00     | 1.24   | 0.00  | 0.41   | 4.13    |

  

| MVT subset | object blocking | person blocking | partial view | pattern | pose  | shape | subcategory | texture |
|------------|-----------------|-----------------|--------------|---------|-------|-------|-------------|---------|
| 17 ms      | 0.00            | 0.00            | 0.69         | 27.59   | 21.38 | 3.45  | 1.38        | 0.69    |
| 50 ms      | 0.00            | 0.00            | 1.06         | 23.26   | 21.75 | 1.36  | 2.27        | 0.76    |
| 100 ms     | 0.40            | 0.00            | 1.61         | 20.56   | 20.97 | 2.42  | 3.63        | 0.40    |
| 150 ms     | 0.56            | 0.00            | 1.67         | 22.78   | 20.56 | 3.89  | 1.11        | 1.11    |
| 250 ms     | 0.00            | 1.15            | 4.60         | 22.99   | 19.54 | 1.15  | 3.45        | 1.15    |
| 10 sec     | 0.00            | 0.00            | 2.07         | 19.42   | 22.73 | 4.13  | 0.83        | 0.83    |

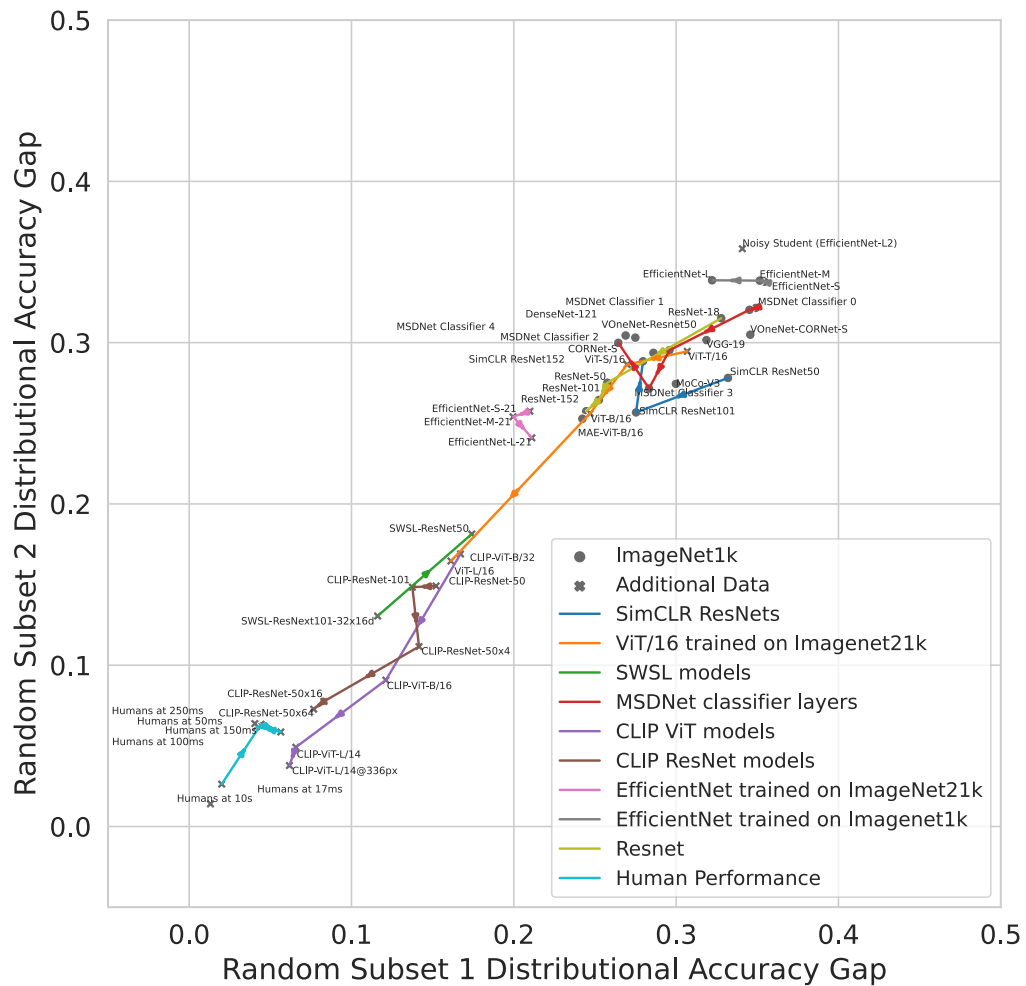

Figure 17: Robustness gap for our finetuned models on two randomly sampled subsets of our experiment data, balanced between ImageNet and ObjectNet. Lines connect model families with arrows pointing in direction of increasing model capacity. Compare with fig. [7](#)

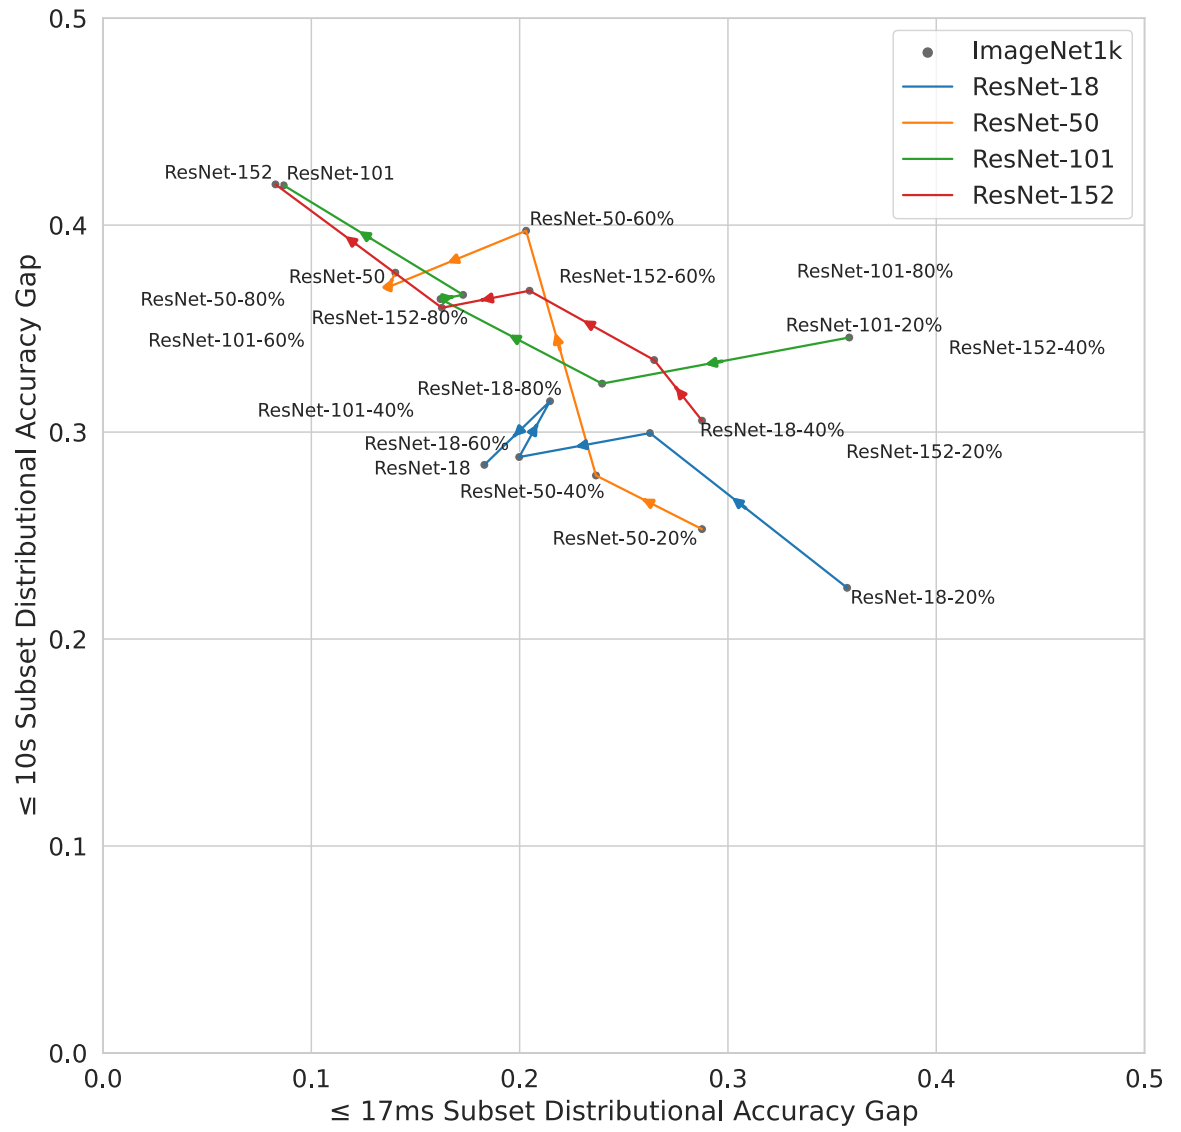

Figure 18: Robustness gap for our finetuned ResNets trained on varying percentages of the ImageNet training set. Lines connect the same architectures with arrows pointing in direction of increasing dataset percentage. Compare with fig. 7



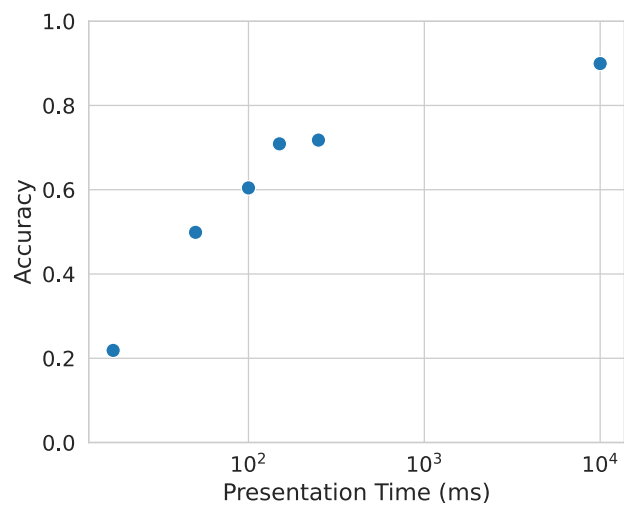

Figure 19: Human accuracy vs Image presentation time from Mechanical Turk results. Time is log-scale with a sigmoid fit

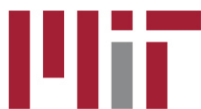

Massachusetts Institute of Technology  
Committee on the Use of Humans as Experimental Subjects  
77 Massachusetts Avenue Building E25-143B Cambridge, MA 02139-4307

**Submission Date:** Mar-29-2023

**Title:** E-4846, Multi-Modal Knowledge Tracking and Storytelling (mm-KTS) 80466CSDRP (in lab)

**Principal Investigator:** Barbu, Andrei

**Department:** CSAIL - PI Research

**Faculty Sponsor:** Katz, Boris

**Start Date:** Apr-01-2023

**End Date:** Apr-01-2026

**Determination:** Exempt

Your research activities meet the criteria for exemption as defined by Federal regulation 45 CFR 46 under the following:

**Exempt Category 3 - Benign Behavioral Intervention**

Research involving benign behavioral interventions where the study activities are limited to adults only and disclosure of the subjects' responses outside the research could not reasonably place the subjects at risk for criminal or civil liability or be damaging to the subjects' financial standing, employability, educational advancement, or reputation. Research does not involve deception or participants prospectively agree to the deception. 45 CFR 46.104(d)(3)

All members of the research team must adhere to the policies as outlined in the [Investigator Responsibilities for Exempt Research](#). If the facts surrounding your evaluation change, you are required to submit a new Exempt Evaluation. Research records may be audited at any time during the conduct of the study.

email: [couhes@mit.edu](mailto:couhes@mit.edu) | phone: 617-253-6787 | website: [couhes.mit.edu](http://couhes.mit.edu)



Massachusetts Institute of Technology  
Committee on the Use of Humans as Experimental Subjects  
77 Massachusetts Avenue Building E25-143B Cambridge, MA 02139-4307

**Submission Date:** Sep-10-2019

**Title:** E-1632, Object recognition on Mechanical Turk

**Principal Investigator:** Katz, Boris

**Department:** Computer Science and Artificial Intelligence Laboratory

**Faculty Sponsor:**

**Start Date:** Sep-17-2019

**End Date:** Oct-01-2022

**Determination:** Exempt

Your research activities meet the criteria for exemption as defined by Federal regulation 45 CFR 46 under the following:

**Exempt Category 3 - Benign Behavioral Intervention**

Research involving benign behavioral interventions where the study activities are limited to adults only and disclosure of the subjects' responses outside the research could not reasonably place the subjects at risk for criminal or civil liability or be damaging to the subjects' financial standing, employability, educational advancement, or reputation. Research does not involve deception or participants prospectively agree to the deception. 45 CFR 46.104(d)(3)

All members of the research team must adhere to the policies as outlined in the [Investigator Responsibilities for Exempt Research](#). If the facts surrounding your evaluation change, you are required to submit a new Exempt Evaluation. Research records may be audited at any time during the conduct of the study.

email: [couhes@mit.edu](mailto:couhes@mit.edu) | phone: 617-253-6787 | website: [couhes.mit.edu](http://couhes.mit.edu)
